## **Neurology in a Changing Climate: A Scoping Review**

**Authors:** Shreya Louis<sup>1</sup>, Alise Carlson<sup>2</sup>, Abhilash Suresh<sup>1</sup>, Joshua Rim<sup>2</sup>, MaryAnn Mays<sup>2</sup>, Daniel Ontaneda<sup>2</sup>, Andrew Dhawan<sup>2,\*</sup>

### **Affiliations:**

<sup>1</sup>Lerner College of Medicine, Cleveland Clinic, Cleveland, OH, USA 44195

<sup>2</sup>Neurological Institute, Cleveland Clinic, Cleveland, OH, USA 44195

**Corresponding Author:** \* Andrew Dhawan

**Email:** dhawana@ccf.org

**Funding:** None

**Conflict of Interest:** All authors declare no conflicts of interest.

**Authorship:** SL worked to design the study and wrote the manuscript. AC, AS, JR, MM, and DO edited the manuscript. AD designed the study and wrote the manuscript.

**Figures:** 3

**Total word count:** Abstract (285) + Introduction (291) + Methods (193) + Results (2923) + Discussion (839) + Figure captions (112) = 4643

**Words in abstract:** 285

**Words in main text:** 4358

**Words in references:** 3683

**Words in figure/table captions:** 112

## Key Points

**Question:** How does climate change impact neurological disease?

**Findings:** 136 articles were identified relating neurologic disease to climate change. Articles were grouped into three key themes, highlighting evidence linking neurologic disease exacerbation to temperature fluctuation, tick-borne infections with climate change, and airborne pollutants to cerebrovascular disease.

**Meaning:** A substantial body of literature suggests that neurologic disease incidence, morbidity, and mortality is directly impacted by climate change and its sequelae, but much remains to be uncovered.

## Abstract

**Importance:** Although the international community collectively seeks to reduce global temperature rise to less than 1.5°C, there are already irreversible environmental changes that have occurred, and currently available evidence suggests these changes will continue to occur. As we begin to witness the effects of a warming planet on human health, it is imperative that as neurologists we anticipate the ways in which the epidemiology and incidence of neurologic disease may be affected.

**Objective:** In this review, we organize our analysis around three key themes related to climate change and neurologic health: extreme weather events and temperature fluctuations, emerging neuro-infectious diseases, and pollutant impacts. Across each of these key themes, we appraise and review recent literature relevant to neurological disease and the practice of neurology.

**Evidence Review:** Studies were identified using a set of relevant search terms relating to climate change and neurologic diseases in the PubMed repository for publications between 1990 and 2021. Studies were included if they pertained to human incidence or prevalence of disease, were in the English language, and were relevant to neurologic disease.

**Findings:** We identified a total of 136 articles, grouped into the three key themes of our study; extreme weather events and temperature fluctuations (23 studies), emerging neuro-infectious diseases (42 studies), and pollutant impacts (71 studies). Broadly, the studies included highlighted the relationships between neurologic symptom exacerbation and temperature variability, tick-borne infections and warming climates, and airborne pollutants and cerebrovascular disease incidence and severity.

**Conclusions and Relevance:** Our work highlights three key priorities for further work; namely, neuro-infectious disease risk mitigation, an understanding of the pathophysiology of airborne pollutants on the nervous system, and research into how to improve delivery of neurologic care in the face of climate-related disruptions.

## Introduction

The effects of climate change on health are only beginning to be understood. In 2012, the Global Climate and Health Alliance drafted the Doha Declaration, a call to prioritize global policies to protect health as it is affected by climate change<sup>1</sup>. International calls for political advocacy and environmental justice surrounding the threat of climate change to human health have since followed.<sup>2</sup> In September 2021, in the face of increasing extreme weather events attributed to climate change, over 220 medical journals published a joint editorial calling for the “urgent action to keep average global temperature increases below 1.5°C, halt the destruction of nature, and protect health”.<sup>3</sup>

Climate impacts on human health are well-documented<sup>4-7</sup>, but the impacts on patients with neurologic disease are less well characterized. The effects of a changing climate are unequally distributed and will disproportionately affect those in developing nations that have polluted less than wealthy nations.<sup>8,9</sup> Climate change is also inextricably linked with airborne pollutant emissions produced by the combustion of fossil fuels, and studies on the topic have brought attention to the effects not only on the respiratory and cardiovascular systems<sup>10-12</sup>, but also neurological disorders<sup>13-15</sup>.

As the warming of our planet becomes increasingly apparent, there is an urgency to understand the impact of increasing temperatures on neurologic health in order to mitigate the effects on morbidity, mortality, and the burden on healthcare workers and health systems. Neurologists and neuroscientists have a duty not only to critically examine these potential changes but also to quantify their impact to better prepare patients and health care systems. Here, we present a scoping review of the literature pertaining to neurologic disease associated with climate change and airborne pollutants and identify avenues for further research in this increasingly important field.

## Methods / Literature Search strategy

Studies were identified by literature search of the PubMed repository for publications from January 1<sup>st</sup> 1990 to May 30<sup>th</sup> 2021 using the following search terms (alone or in combination with): “climate”, “climate change”, “global warming”, “air pollution/adverse effects”, “drought”, “flood”, “health systems”, “health policy”, “neurological disorders”, “neurology”, “multiple sclerosis”, “dementia”, “stroke”, “seizures”, “epilepsy”, “headache”, or “migraine.” Search terms relating to specific disease entities were chosen due to their high global prevalence and burden of disease worldwide<sup>16</sup>.

Search results were input into the Covidence systematic review software where studies were screened, and duplicates were removed<sup>17</sup>. Authors SL and AD independently screened the remaining titles and study abstracts. Studies were excluded if the publications were without English translation, had primarily animal subjects (apart from neuroinfectious diseases in which case mosquito or tick-based studies were included), or if the study topic was not relevant to neurological conditions. The remaining studies were included for full-text review, categorization into the themes of the manuscript, and data extraction.

The Map depicting neuroinfectious diseases was created using the `rnaturalearth` v0.1<sup>18</sup>, `rnaturalearthdata` v0.1<sup>19</sup>, and `ggplot2`<sup>20</sup> packages in R v4.1.1.<sup>21</sup> Sankey diagram was created using the `networkD3` v0.4<sup>22</sup> package in R v4.1.1.<sup>21</sup>

## Results

Our search revealed a robust body of literature describing the effects of climate change in relation to neurologic disease (Figure 1). The included publications consisted of 136 studies with 42 studies from Asia, 41 studies from North America, 39 studies from Europe, 5 studies from Africa, 2 studies from Australia and Oceania, and 7 studies which spanned two or more continents. No relevant society guidelines, position statements, or governmental reports were identified.

Two independent reviewers (SL and AD) grouped manuscripts into one of three categories: the effects of extreme weather and temperature changes on neurological conditions, emerging neuro-infectious diseases, and pollutant impacts. Relevant data including study population, intervention, comparators, and outcomes, were extracted from all studies and synthesized for this scoping review.

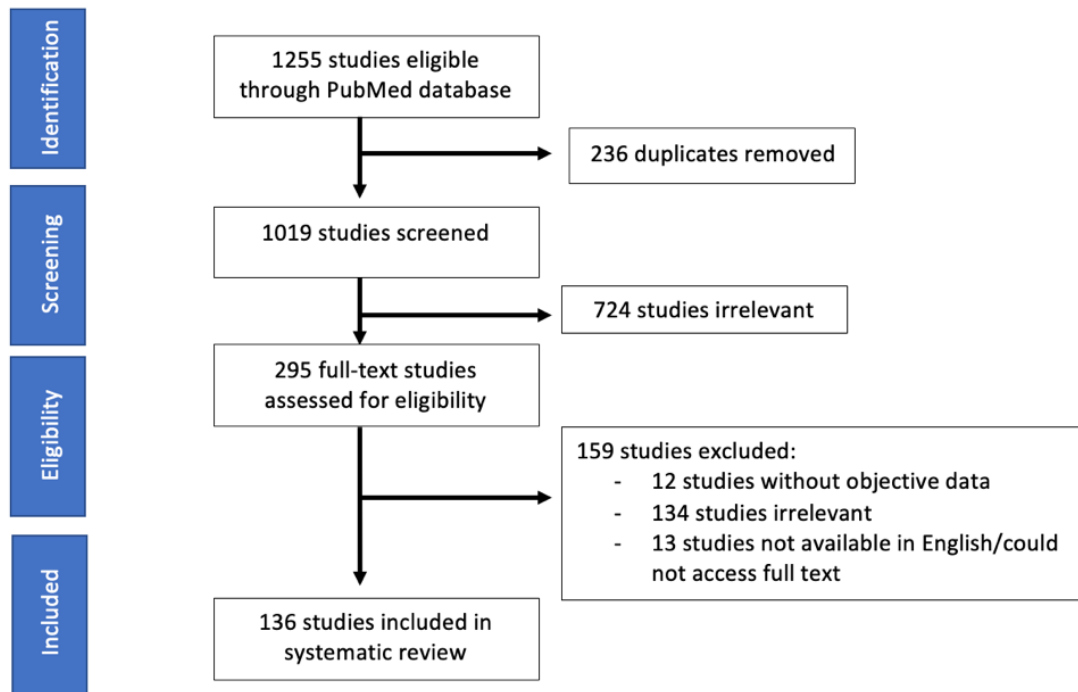

**Figure 1: PRISMA diagram depicting studies included in this scoping review.**

## **The effects of temperature fluctuations on neurological conditions**

### *Stroke*

Our search identified 12 studies relating weather to ischemic stroke incidence, with the burden of evidence favoring an association of increased stroke in hotter weather as well as in extreme cold. We could not identify any consensus on mechanism relating changes in climate to ischemic stroke events. Six studies showed an increase in incidence of ischemic stroke events with increasing temperature and increased or decreased relative humidity.<sup>23-28</sup> These results were in contrast to those from two large studies that identified increased stroke admissions with cold temperatures and hypothesized that colder temperatures contributed to stroke by inducing vasoconstriction and increasing blood viscosity.<sup>29,30</sup> Bai and colleagues estimated the attributable fraction of stroke admissions in Ontario to cold temperature as 1.71%, with the burden of strokes attributable to moderate changes in temperatures as opposed to extreme changes.<sup>29</sup> Temperature variability may also contribute to acute stroke incidence, as Lei and colleagues examined over 140,000 first-time stroke patients in Shenzhen, China, and attributed 2-4% of stroke cases to increased diurnal temperature range (greater than 5.5-8°C in a 24h period, seasonally-dependent).<sup>31</sup> The burden of disability-adjusted life years related to heat waves in a study by Yoon and colleagues in South Korea was found to be driven by cerebrovascular diseases, estimated at 72.1% of the total burden of disease.<sup>32</sup> Two studies used climate projections into the mid-late 21<sup>st</sup> century to predict ischemic stroke mortality, and showed an increase in years of life lost after accounting for population change, fertility, greenhouse gas emissions, and physical inactivity levels.<sup>33,34</sup>

### *Epilepsy*

Our search strategy identified three studies relating the frequency of seizures in association with meteorological changes. Unstable weather, defined as alterations in barometric pressure by 10 hectopascals (hPa) and a change of 5°C in 48h in a series of 30 patients with epilepsy, was associated with a season-dependent change in seizure frequency. Fluctuations were associated with changes in seizure frequency among 40% of participants in spring, autumn, and winter, but only 7% of participants in the summer.<sup>35</sup> A study of 604 adult patients with epilepsy linked low atmospheric pressure and high relative air humidity to increased seizure risk but found that high ambient temperatures were associated with reduced seizure risk.<sup>36</sup> Chiang and colleagues examined the number of outpatient and inpatient visits in patients with epilepsy as a function of air pollutants and ambient temperature and showed that there was a statistically significant association with ambient temperature and various air pollutants, with more visits during the winter months.<sup>37</sup>

### *Dementia*

One study examined dementia-related hospital admissions and meteorological variables. Studies were retrospective observational cohorts, examined based on historical climate data. The largest such study analyzed data from 3,069,816 Medicare patients in New England over 10 years and used time-varying Cox proportional hazards models to estimate the association between hospital admissions for dementia and temperature variability. In the summer months, mean temperature increases of 1.5°C associated with a 12% increased hazard of admission.<sup>38</sup> Two studies showed

that patients with dementia are often at higher risk of injury or death due to extreme heat events such as bushfires.<sup>39,40</sup>

### *Multiple Sclerosis*

Three studies of patients with multiple sclerosis (MS) met the inclusion criteria for this study. While it is well-known that high temperatures exacerbate symptom burden in patients with MS, in one study, emergency department presentations for MS disease exacerbation (1,265 patients) were found to be associated with increased temperature variability on the preceding day. This study found an 8.81% increase in emergency department presentations per 1°C increase in temperature range (95% CI 3.46-14.44%).<sup>41</sup> An analysis of climatic variables and 260 MS admissions from Serbia showed that there was a statistically significant reduction of relapses in the period of high vitamin D exposure (a known geographical co-variate with disease incidence), and an increased number of relapses in the spring compared to other seasons.<sup>42</sup> A randomized crossover study of MS patients undergoing physical therapy demonstrated differential responses in a warm climate (Spain) as opposed to a cold climate (Norway), with changes favoring warmer climates and persisting up to 6 months after treatment.<sup>43</sup>

### *Headache*

Two studies examined headache in association with meteorological variables. A large study of over 22,000 headache visits to the emergency department showed that an increase in temperature by 5°C was associated with a relative risk of headache presentation of 1.042 (95% CI 1.009 - 1.076).<sup>44</sup> Mukamal and colleagues examined the associations between weather and headache incidence at a single center using a case-crossover design, examining temperature, barometric pressure, relative humidity, and pollutant levels in the 24-72h preceding presentation.<sup>45</sup> In this study, higher temperatures were also associated with higher risk of presentation for headache, as did lower barometric pressure, particularly for non-migraine headache.<sup>45</sup>



## Emerging neuro-infectious diseases

We identified a robust body of literature related to climate patterns and neuro-infectious diseases, across 41 total studies, of which 10 were reviews and 31 were primary studies. Diseases studied included West Nile virus (WNV, 14 studies), Dengue virus (DENV, 2 studies), Japanese encephalitis (JEV, 8 studies), tick-borne encephalitis (TBE, 16 studies), and other emerging pathogens (Supplementary Table 1). Despite the growing literature on the subject, no studies were identified with our search strategy that related to COVID-19. Figure 2 highlights the geographic skew of evidence towards Europe and the significant paucity of studies in Africa and South America. The web of ecological interactions that leads to the emergence of these diseases and their transmission to humans is complex. Multiple factors, including climate, are implicated in disease transmission and prevalence. Several existing reviews highlighted the impact of extreme weather such as floods on the transmission of mosquito-borne and rodent-borne diseases. However, it is noted that a wide range of interactions including human population density and behavior, host-human interactions, land use patterns, pollutant effects, and disease adaptability all affect disease incidence.<sup>46-49</sup>

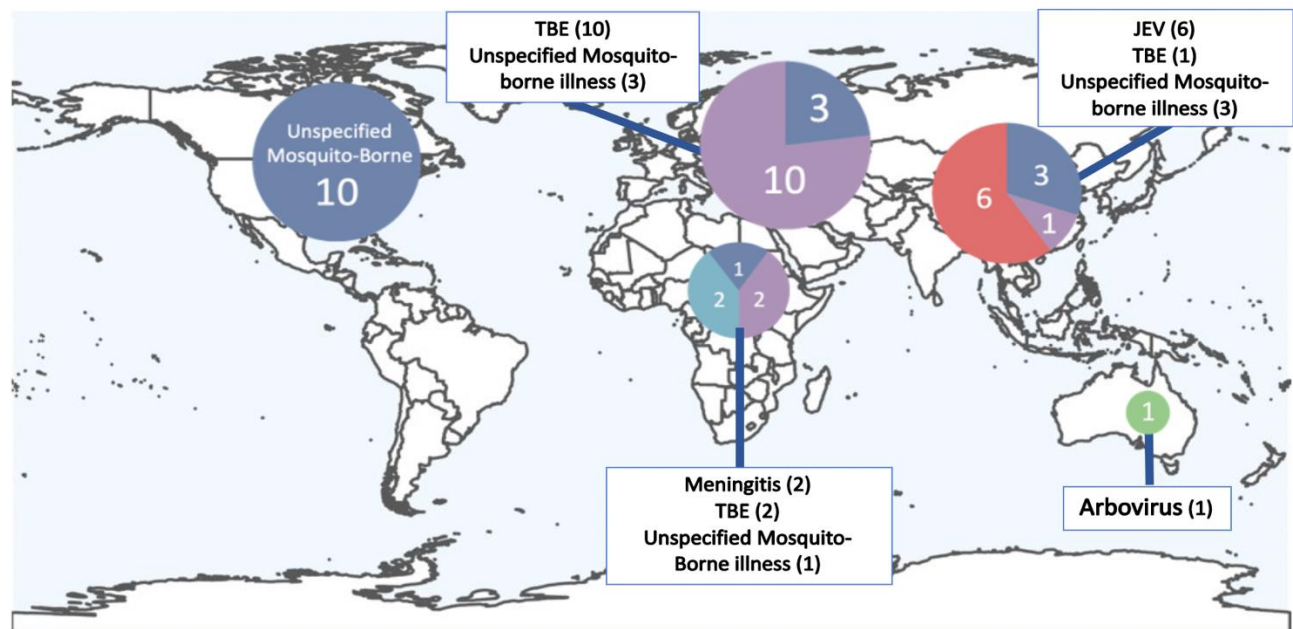

**Figure 2: Neuro-infectious diseases studied by location.** Map depicts number and type of reports for reports examining neuro-infectious diseases as stratified by location. 10 reports were published from North America, 13 reports from Europe, 5 reports from Africa, 10 reports from Asia, and 1 report from Australia. TBE refers to tick-borne encephalitis. JEV refers to Japanese encephalitis virus.

Most individual studies on the topic of climate associations with neuro-infectious diseases were observational, retrospective, and used vector incidence or disease prevalence with historical geospatial climactic data and time series modeling to establish associations between climate and infection risk. Infection risks are multifactorial and could often be explained by many factors; for

instance, in examining why JEV incidence increased in the upslope regions of the Himalayas, Baylis and colleagues noted the incidence may be explained by either improved detection and inhomogeneous distribution of vaccines, an increased incidence of JEV due to climate change, or a combination.<sup>50</sup> Our search also identified studies highlighting how regional factors beyond an increase in temperature could facilitate disease transmission. In the African ‘meningitis belt,’ aerosolized matter blown by the Harmattan winds is associated with increased meningitis transmission, whereas in the Czech Republic, flooding is associated with incidence of TBE.<sup>51-53</sup> Similarly, reasons for the increase of TBE in Europe remain controversial, with some arguing that socioeconomic factors such as the fall of the Soviet Union caused changes in human behavior leading to increased exposure, and others arguing that climactic change better accounts for the increased incidence.<sup>54,55</sup>

We identified one mechanistic study where mathematical modeling of viral vector dynamics and climate variables predicted optimal disease transmission of WNV at temperatures of 23-26 degrees Celsius.<sup>56</sup> Predictive modeling of WNV incidence in North America with climate simulations from 2021-2080 suggested an expansion of suitable conditions for the disease, particularly in the southern regions of the United States, due to higher temperatures, lower rainfall, a lengthening of mosquito season, and increase in droughts.<sup>57-59</sup> Transmission periods for TBE in Europe are predicted to lengthen and new foci in Scandinavia may emerge, as suggested by analyses of epidemiological data between 1969-2018 from Sweden, East Germany, Czech Republic, Austria, Slovenia, and Northeast Italy.<sup>60,61</sup>

## Pollutant impacts

Studies relating pollutant impacts to neurologic disease were sub-grouped by disease: multiple sclerosis (MS), headaches, ischemic stroke and TIA, intracerebral hemorrhage (ICH), amyotrophic lateral sclerosis (ALS), Parkinson's disease (PD), and dementia. Pollutants have also been shown to increase neurologic disease mortality in a general sense, with one study finding that periods of high air pollution due to heat waves and fires tripled the relative risk of death due to neurologic disease.<sup>62</sup> Figure 3 summarizes the numerous interrelationships between pollutant exposures and neurologic disease.

### *Dementia*

The strongest environmental risk of air pollution was identified in the dementia literature, where nearly 6.1% of cases of incident dementia have been estimated to be attributable to PM2.5 (particulate matter with diameter less than 2.5 microns) and NO<sub>2</sub> exposure.<sup>63</sup> Clinical diagnosis of dementia<sup>63,64</sup>, and objective measures of cognitive decline, such as the MMSE<sup>65,66</sup>, semantic fluency, and word recall<sup>67</sup> have been associated with prior years' exposure to PM2.5. Indeed, it has been shown that amyloid PET scanning is more likely to be positive if living in an area with greater PM2.5 in the preceding 13-15 years.<sup>68</sup> In patients who have pre-existing Alzheimer's disease, Yitshak-shade and colleagues found association between PM2.5 exposure and risk of hospital admission.<sup>69</sup> Imaging evidence of an association between PM2.5 exposure and neurodegenerative changes is provided by longitudinal studies of healthy patients with interval MRI scans, which have shown white matter loss in those exposed to greater concentrations of PM2.5.<sup>70-74</sup> PM<sub>10</sub> (coarse) has been less well-studied and only a single report linking exposure in women to decreased mini-mental status examination (MMSE) score has been published.<sup>75</sup> Exposure to PM<sub>10</sub>, particularly in patients harboring the APOE4 allele, has been shown to associate both with dementia incidence and rate of cognitive decline, as well as front-temporal thinning on MRI.<sup>66,74,76-78</sup> The effects of exposure to ground-level ozone (O<sub>3</sub>) remain less clear, as there have not been as strong associations with dementia incidence<sup>76</sup>, increased odds of amyloid PET positivity<sup>68</sup>, or MMSE score decline.<sup>66</sup> Nitrogenous gases have shown an association with vascular dementia<sup>79</sup>, global brain atrophy<sup>74</sup>, and a slightly faster rate of decline in those with the APOE4 allele, with differing results for MMSE-scored cognitive decline and all-cause dementia.<sup>63,64,66,75</sup> Sulfur dioxide (SO<sub>2</sub>) exposure has also been associated with MMSE score decline.<sup>66,78</sup> Ten-year average exposure to black carbon has not shown an association with all-cause dementia.<sup>64</sup>

### *Ischemic stroke/Transient Ischemic Attack*

Long-term exposures to airborne pollutants had substantial support for association with ischemic stroke. An analysis of the Global Burden of Disease study concluded that 9% of stroke disability-adjusted life years (DALYs) and 8.5% of stroke deaths could be attributed to PM2.5 exposure.<sup>80</sup> After adjusting for sociodemographic factors, a study of 3,287 participants with incident stroke living within 100m of a roadway (associated with increased airborne pollutant exposure), was associated with a hazard ratio of 1.42 (95% CI 1.01-2.02) for ischemic stroke, though imaging-based biomarkers of small-vessel disease in a subset of these patients did not show significant association.<sup>81,82</sup> A Chinese study of 12,291 ischemic strokes revealed a statistically significant association with PM<sub>1</sub> and PM2.5 exposure three years prior to stroke event, but not with NO<sub>2</sub> or

PM10 exposure.<sup>83</sup> Long-term exposures in a German study showed elevated risk of ischemic stroke regardless of particle size; examining PM2.5abs, PM2.5, and PM10.<sup>84</sup> Long-term PM2.5 exposure examined in a study of 39,054 participants in China associated significantly with stroke mortality (HR 1.3, 95% CI 1.04-1.65).<sup>85</sup>

Studies examining short-term pollutant exposure and stroke risk generally used a case-crossover design. Results from these studies were conflicting and may depend on the population being studied, as well as the degree of geographic precision with which pollutant levels were examined. For example, of the four studies showing supportive evidence for short-term pollutant exposure to PM10 and stroke<sup>86-89</sup>, the largest studies Liu et al.<sup>86</sup> and Yitshak-Sade<sup>87</sup> had 279,890 events and 4,837 events respectively. On the other hand, two additional studies Royé et al.<sup>30</sup> and Zheng et al.<sup>90</sup> did not find significant associations between short-term PM10 exposure and stroke. Stroke mortality may also be worse on days with greater PM1, PM2.5, PM(coarse), and greater PM10.<sup>91-93</sup> Short-term PM2.5 exposure was more controversial in its association with incident stroke and small vessel disease. We identified three clinical studies and one imaging-based study that did not reveal association<sup>94-97</sup>, and three clinical studies and one imaging-based study that did show association.<sup>86,87,98,99</sup> Similar studies for first-time strokes and ozone exposure have shown mixed associations with a single study showing positive association<sup>100</sup> and four studies showing no association.<sup>30,96,100-102</sup> NO2 levels may also be associated with greater incidence of stroke-related admissions and stroke mortality in the short term,<sup>89,103</sup> though two other studies did not show association.<sup>30,90</sup> Shen and colleagues examined short-term SO2 exposure in relation to the rates of ischemic and hemorrhagic stroke and found a positive association,<sup>104</sup> but two other studies did not find any association<sup>30,90</sup> It may therefore be the case that individual factors, such as ethnic or genetic factors or degree of exposure, contribute significantly to the variability in this association.<sup>95,98,101</sup>

Only one study examining TIA risk and pollutants was identified. PM2.5, PM10, CO, NO2, and SO2 were significantly greater on days with TIA events than days without, and O3 did not show this association.<sup>105</sup>

### *Intracerebral hemorrhage*

We identified three primary studies that examined risk of intracerebral hemorrhage attributable to environmental pollutants. In one study of 368 cases of small-vessel attributed ICH, short term exposure to increased PM2.5 was greater on the three days preceding the hemorrhage compared to a control period 15-17 days prior to the index event.<sup>106</sup> A second study of 517 patients did not identify any association between PM2.5, black carbon, or nitrogen dioxide, and ICH, and used a similar design comparing exposures 1-7 days prior to the hemorrhage to a referent set of days in the same month.<sup>107</sup> PM2.5 and PM10 were not shown to associate with hemorrhagic stroke in a large Chinese study involving 69,399 subjects.<sup>86</sup>

### *Multiple Sclerosis*

MS incidence as it relates to long-term air pollution exposure was assessed in one study of 6,203 patients, which did not show an association.<sup>108</sup> Two studies, together comprising over 10,000 MS relapses, examined short-term PM10 exposure and the risk of MS-related hospitalization. There was a strong association between MS relapse and PM10 exposure within the first 1-3 days or one

week prior to the index event.<sup>109,110</sup> One case-crossover study examined short-term PM2.5 exposure and MS relapse, with an increased risk of relapse related to exposure 3 weeks prior.<sup>111</sup> Two studies examined the short-duration effects of air pollutants (diesel exhaust or particulate matter versus filtered medical air) on serum markers of neuroinflammation within 24h of exposure (IL-6, TNF-alpha, BDNF, S100b, NSE, urinary VMA), and showed either inconsistent or no statistically significant differences between exposed and control groups.<sup>86,112</sup> The pro-inflammatory association with PM10 exposure may relate to the chemokine receptor CCR6 in CD4+ T cells, found to be preferentially upregulated in MS patients after exposure.<sup>113</sup>

### *Headaches*

Three studies examined recurrent headaches and pollutant exposures. The largest used a case-control design and leveraged electronic health records to examine 89,575 cases of migraine in California, with a higher frequency of migraine-specific urgent care visits for increasing average annual PM2.5 and NO2 levels.<sup>114</sup> Two smaller studies, each with at least 18,000 patients, examined short-term pollutant exposures and visits for migraine, with statistically significant effects for PM2.5, PM10, NO2, O3, and CO exposures in adults, and PM2.5, CH4, SO2, NO2, and total hydrocarbon exposures in children.<sup>115,116</sup>

### *Parkinson's Disease*

Parkinson's disease incidence as it relates to particulate matter exposure in the long-term has been examined by multiple studies. Three studies showed inconsistent or no significant association<sup>117-119</sup>, two showed association with PM10<sup>120,121</sup> and one showed association with PM2.5.<sup>122</sup> Among the most robust studies was a case-control study involving 38,475 PD patients from Ontario, where 2-year exposures for PM2.5, NO2, and O3, at a resolution of 1km x 1km were shown to associate with PD incidence (HRs ranged from 1.03-1.04).<sup>122</sup> NO2 exposure was examined in five additional studies and its impact remains controversial, with increased concentrations noted in PD hotspots<sup>121</sup>, and two additional studies (combined 11,525 PD patients) suggesting association<sup>123,124</sup>, in opposition to two smaller studies (combined 1,496 PD patients) that did not show any statistically significant association.<sup>117,120</sup>

### *ALS*

ALS incidence related to air pollutant exposure was studied with varying results. One study involving 917 ALS patients from a Dutch national registry showed an increased risk of ALS in patients with long-term exposure to PM2.5 and NO2, but another series of 52 patients examining PM10 exposure did not replicate these findings.<sup>125,126</sup> Among patients with ALS and Parkinson's disease, less controversial is the risk of disease aggravation in association with shorter-term exposure to PM2.5, which may lead to first-time admission and diagnosis of the underlying neurological condition.<sup>127</sup>

### *Neurodevelopment*

Two studies were identified within our search strategy that examined neurodevelopment and pollutant exposure. Both studies examined over 500 children combined in urban settings in the United States and Mexico. Pollutant exposures in these studies were remarkably detailed, at resolutions of 1km x 1km to 10km x 10km, and outcomes examined included go-no go tasks or

measures of neurocognitive performance. Both studies showed that prenatal PM2.5 exposure, particularly during the third trimester, after adjustment for various confounders, predicted poorer neurocognitive outcomes.<sup>128,129</sup>

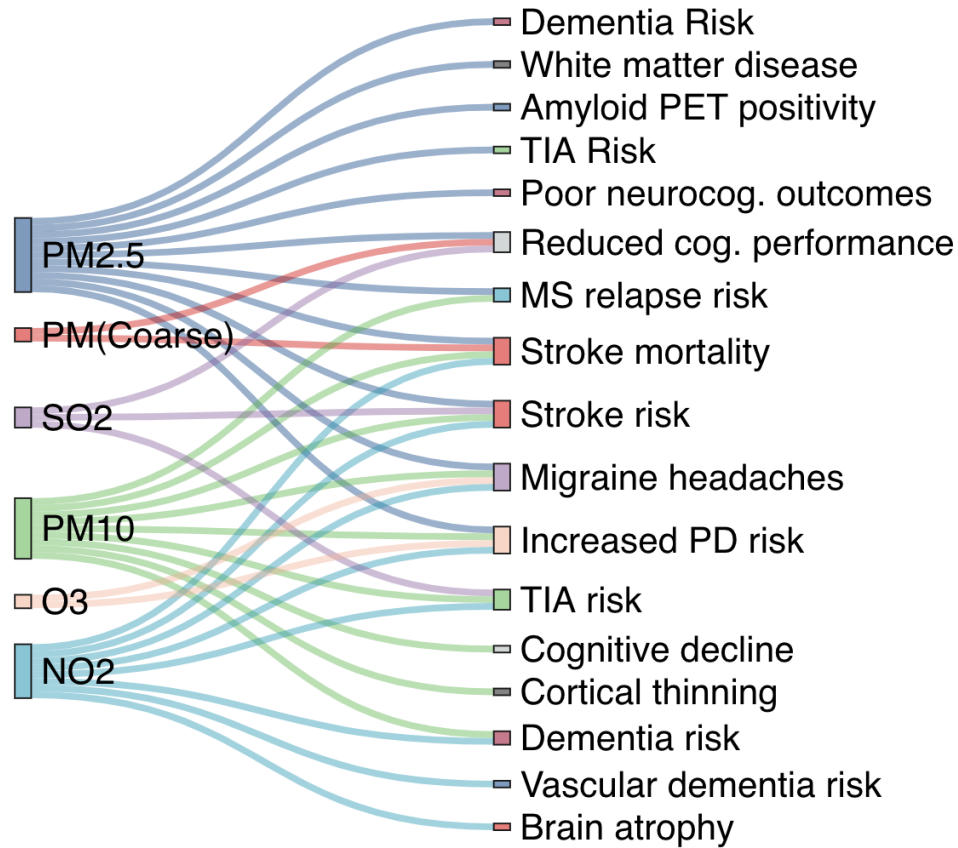

**Figure 3: Relationships between pollutants and identified neurologic links.** Sankey diagram depicting interrelationships between pollutant exposure (left) and neurologic outcome (right). PET refers to positron emissions tomography. TIA refers to transient ischemic attack. MS refers to multiple sclerosis. PD refers to Parkinson's disease.

## Discussion

Our scoping review has identified a wide body of literature pertaining to the impacts of climate change on neurologic disease. The results highlight many connections between the incidence and severity of neurologic disease and the effects of climate change and pollution. Perhaps the most striking finding of this review was how little is known regarding the effects of meteorological changes on neurologic illness, or on how the delivery of neurologic care should be adapted in the face of climatic events and changes.

This review has brought forward three key areas for expedited study owing to their potential for rapid change, large scale impact on neurologic health, and the potential for risk mitigation. Foremost, there is a priority to develop an understanding of emergent neurotropic infectious diseases. Diseases such as Zika virus, West Nile virus, tick-borne encephalitis, and COVID-19 have both the potential and precedence for very rapid spread across susceptible populations, with only a rudimentary understanding of their long-term effects on the nervous system. In the bulk of studies examined, we found evidence for vector incidence linked to climate, land use patterns, and human activity. An understanding of these factors and how they relate to disease vectors has given rise to novel strategies for risk mitigation, such as vaccination programs, surveillance systems, and ecological defenses such as the Wolbachia bacteria in the case of Zika virus.<sup>130,131</sup> In addition, as the effects of climate change intensify, migration and increased numbers of ‘climate refugees’ could result in larger populations to non-vector borne infections, such as COVID-19, and strategies to both study and mitigate these risks are needed.

Second, we identified an opportunity to enhance understanding of the risk of neurologic disease as it relates to airborne pollutant exposure. Specifically, multiple studies examined the degree of air pollution associated with cerebrovascular disease and dementia. Urban centers with high population density in developing nations are regions with the highest concentrations of airborne pollutants, and therefore represent a large population at risk for potentially preventable, chronic, neurologic diseases. An understanding of the pathophysiology of pollutants on the nervous system, as well as reduction and mitigation strategies, will be crucial to prevent increases in the incidence of these diseases.

Third, our work suggests that there is a potential unmet need in planning for the robust delivery of neurologic care in the face of ecological instability. We propose that tele-neurology may serve as a key solution to the disruptions that may occur due to climate changes in order to maintain continuity of neurologic care. The COVID-19 pandemic has highlighted how telemedicine can help patients obtain health-care access but could not otherwise access it.<sup>132</sup> Further infrastructure, investment, and development of clinical skills and best practices in tele-neurology will be increasingly important to deliver care in a world with increasingly extreme weather events. Research into how to effectively manage patients with complex chronic neurologic conditions through tele-medicine is needed, as well as strategies for developing tele-neurology infrastructure in previously inaccessible regions.<sup>133</sup>

The present study has several limitations; first, we were limited to studies that were published in English or with suitable English translation. A risk of bias assessment for this scoping review

was not performed, given the retrospective, observational nature of nearly all studies. Studies often relied on multi-variate modeling and were therefore biased by choice and measurement of the variables included in each of the models; differing modeling approaches often did not allow for direct comparison or meta-analysis of results. In addition, there are challenges unique to meteorological literature, including limitations on the spatial resolution of climate data, missing historical data, instrument-dependent effects, and limited understanding of true individual exposures due to behavioral variation. Modeling climactic variables' effects on health outcomes often involves a process of selecting a lag time between exposure and outcome of interest, which can be arbitrary. There was significant variability in the results of the reviewed studies as differing lag times were often considered; a factor that limited inter-study comparison. Studies identified showed a geographic bias towards higher-income countries, whereas climate change is predicted to disproportionately affect those in developing nations. For example, our search strategy did not identify any studies from South America, and only five studies from Africa.

Practicing neurologists must consider the impact of climate change on each patient and their presentation. Akin to the social determinants of health, a changing climate cannot be overlooked as a key mediator of disease burden. The elderly patient with dysautonomia or MS and no access to air conditioning, the patient with symptoms of a small-vessel stroke in a city with increasing air pollution, or the patient with tick-borne encephalitis due to a vector never seen in their region previously, are all vignettes that will undoubtedly become more common. Their neurologic conditions are directly caused or exacerbated by the impacts of human-induced climate change, and we must acknowledge the burden of illness on those who bear little responsibility for greenhouse gas emissions. In doing so, our goal is to inspire action, research, and elicit true change to mitigate the risks of an already changing climate.



## Figures

**Figure 1: PRISMA diagram depicting studies included in this scoping review.**

**Figure 2: Neuro-infectious diseases studied by location.** Map depicts number and type of reports for reports examining neuro-infectious diseases as stratified by location. 10 reports were published from North America, 13 reports from Europe, 5 reports from Africa, 10 reports from Asia, and 1 report from Australia. TBE refers to tick-borne encephalitis. JEV refers to Japanese encephalitis virus.

**Figure 3: Relationships between pollutants and identified neurologic links.** Sankey diagram depicting interrelationships between pollutant exposure (left) and neurologic outcome (right). PET refers to positron emissions tomography. TIA refers to transient ischemic attack. MS refers to multiple sclerosis. PD refers to Parkinson's disease.

## References

1. The Global Climate & Health Alliance. The Doha Declaration on Climate, Health and Wellbeing. <https://climateandhealthalliance.org/wp-content/uploads/2018/02/Doha-Declaration-on-Climate-Health-and-Wellbeing.pdf>
2. Sibbald B. Physicians' roles on the front line of climate change. *Can Med Assoc J*. 2013;185(3):195-195. doi:10.1503/cmaj.130087
3. Atwoli L, Baqui AH, Benfield T, et al. Call for Emergency Action to Limit Global Temperature Increases, Restore Biodiversity, and Protect Health. *N Engl J Med*. 2021;385(12):1134-1137. doi:10.1056/NEJMe2113200
4. Sauerborn R, Kjellstrom T, Nilsson M. Health as a crucial driver for climate policy. *Glob Health Action*. 2009;2(1):2104. doi:10.3402/gha.v2i0.2104
5. Watts N, Adger WN, Agnolucci P, et al. Health and climate change: policy responses to protect public health. *The Lancet*. 2015;386(10006):1861-1914. doi:10.1016/S0140-6736(15)60854-6
6. Watts N, Amann M, Ayeb-Karlsson S, et al. The Lancet Countdown on health and climate change: from 25 years of inaction to a global transformation for public health. *The Lancet*. 2018;391(10120):581-630. doi:10.1016/S0140-6736(17)32464-9
7. Ingle HE, Mikulewicz M. Mental health and climate change: tackling invisible injustice. *Lancet Planet Health*. 2020;4(4):e128-e130. doi:10.1016/S2542-5196(20)30081-4
8. Friel S, Hancock T, Kjellstrom T, McGranahan G, Monge P, Roy J. Urban Health Inequities and the Added Pressure of Climate Change: An Action-Oriented Research Agenda. *J Urban Health*. 2011;88(5):886-895. doi:10.1007/s11524-011-9607-0
9. Salm L, Nisbett N, Cramer L, Gillespie S, Thornton P. How climate change interacts with inequity to affect nutrition. *WIREs Clim Change*. 2021;12(2). doi:10.1002/wcc.696

10. Di Cicco ME, Ferrante G, Amato D, et al. Climate Change and Childhood Respiratory Health: A Call to Action for Paediatricians. *Int J Environ Res Public Health*. 2020;17(15):5344. doi:10.3390/ijerph17155344
11. De Sario M, Katsouyanni K, Michelozzi P. Climate change, extreme weather events, air pollution and respiratory health in Europe. *Eur Respir J*. 2013;42(3):826-843. doi:10.1183/09031936.00074712
12. Brunekreef B, Holgate ST. Air pollution and health. *The Lancet*. 2002;360(9341):1233-1242. doi:10.1016/S0140-6736(02)11274-8
13. Bergamaschi R, Cortese A, Pichiecchio A, et al. Air pollution is associated to the multiple sclerosis inflammatory activity as measured by brain MRI. *Mult Scler J*. 2018;24(12):1578-1584. doi:10.1177/1352458517726866
14. Lucchini RG, Dorman DC, Elder A, Veronesi B. Neurological impacts from inhalation of pollutants and the nose–brain connection. *NeuroToxicology*. 2012;33(4):838-841. doi:10.1016/j.neuro.2011.12.001
15. Ha S. Air pollution and neurological development in children. *Dev Med Child Neurol*. 2021;63(4):374-381. doi:10.1111/dmcn.14758
16. Feigin VL, Nichols E, Alam T, et al. Global, regional, and national burden of neurological disorders, 1990–2016: a systematic analysis for the Global Burden of Disease Study 2016. *Lancet Neurol*. 2019;18(5):459-480. doi:10.1016/S1474-4422(18)30499-X
17. Veritas Health Innovation. *Covidence Systematic Review Software*. Veritas Health Innovation [www.covidence.org](http://www.covidence.org)
18. South, Andy. *Rnaturalearth: World Map Data from Natural Earth.*; 2017. <https://CRAN.R-project.org/package=rnaturalearth>
19. South, Andy. *Rnaturalearthdata: World Vector Map Data from Natural Earth Used in "Rnaturalearth."*; 2017. <https://CRAN.R-project.org/package=rnaturalearthdata>
20. Hadley, Wickham. *Ggplot2: Elegant Graphics for Data Analysis.*; 2016. <https://ggplot2.tidyverse.org>
21. R Core Team. *R: A Language and Environment for Statistical Computing*. R Foundation for Statistical Computing <https://www.R-project.org/>
22. Allaire JJ, Gandrud C, Russell K, Yetman C. *NetworkD3: D3 JavaScript Network Graphs from R*. <https://CRAN.R-project.org/package=networkD3>
23. Ebi KL, Exuzides KA, Lau E, Kelsh M, Barnston A. Weather changes associated with hospitalizations for cardiovascular diseases and stroke in California, 1983–1998. *Int J Biometeorol*. 2004;49(1). doi:10.1007/s00484-004-0207-5

24. Ma P, Zhou J, Wang S, et al. Differences of hemorrhagic and ischemic strokes in age spectra and responses to climatic thermal conditions. *Sci Total Environ*. 2018;644:1573-1579. doi:10.1016/j.scitotenv.2018.07.080
25. Takumi I, Mishina M, Kominami S, et al. Ambient Temperature Change Increases in Stroke Onset: Analyses Based on the Japanese Regional Metrological Measurements. *J Nippon Med Sch*. 2015;82(6):281-286. doi:10.1272/jnms.82.281
26. Hirel C, Berton L, Preda C, Richard O, Lambert Y, Pico F. Air pollution and humidity as triggering factors for stroke. Results of a 12-year analysis in the West Paris area. *Rev Neurol (Paris)*. 2019;175(10):614-618. doi:10.1016/j.neurol.2019.03.002
27. Han MH, Yi HJ, Kim YS, Kim YS. Effect of Seasonal and Monthly Variation in Weather and Air Pollution Factors on Stroke Incidence in Seoul, Korea. *Stroke*. 2015;46(4):927-935. doi:10.1161/STROKEAHA.114.007950
28. Santurtún A, Ruiz PB, López-Delgado L, Sanchez-Lorenzo A, Riancho J, Zarrabeitia MT. Stroke: Temporal Trends and Association with Atmospheric Variables and Air Pollutants in Northern Spain. *Cardiovasc Toxicol*. 2017;17(3):360-367. doi:10.1007/s12012-016-9395-6
29. Bai L, Li Q, Wang J, et al. Increased coronary heart disease and stroke hospitalisations from ambient temperatures in Ontario. *Heart*. 2018;104(8):673-679. doi:10.1136/heartjnl-2017-311821
30. Royé D, Zarrabeitia MT, Riancho J, Santurtún A. A time series analysis of the relationship between apparent temperature, air pollutants and ischemic stroke in Madrid, Spain. *Environ Res*. 2019;173:349-358. doi:10.1016/j.envres.2019.03.065
31. Lei L, Bao J, Guo Y, Wang Q, Peng J, Huang C. Effects of diurnal temperature range on first-ever strokes in different seasons: a time-series study in Shenzhen, China. *BMJ Open*. 2020;10(11):e033571. doi:10.1136/bmjopen-2019-033571
32. Yoon SJ, Oh IH, Seo HY, Kim EJ. Measuring the burden of disease due to climate change and developing a forecast model in South Korea. *Public Health*. 2014;128(8):725-733. doi:10.1016/j.puhe.2014.06.008
33. Li G, Guo Q, Liu Y, Li Y, Pan X. Projected Temperature-Related Years of Life Lost From Stroke Due To Global Warming in a Temperate Climate City, Asia: Disease Burden Caused by Future Climate Change. *Stroke*. 2018;49(4):828-834. doi:10.1161/STROKEAHA.117.020042
34. Mazidi M, Speakman JR. Predicted impact of increasing average ambient temperature over the coming century on mortality from cardiovascular disease and stroke in the USA. *Atherosclerosis*. 2020;313:1-7. doi:10.1016/j.atherosclerosis.2020.08.035
35. Motta E, Gołba A, Bal A, Kazibutowska Z, Strzała-Orzeł M. Seizure frequency and bioelectric brain activity in epileptic patients in stable and unstable atmospheric pressure and temperature in different seasons of the year – a preliminary report. *Neurol Neurochir Pol*. 2011;45(6):561-566. doi:10.1016/S0028-3843(14)60123-7

36. Rakers F, Walther M, Schiffner R, et al. Weather as a risk factor for epileptic seizures: A case-crossover study. *Epilepsia*. 2017;58(7):1287-1295. doi:10.1111/epi.13776
37. Chiang KL, Lee JY, Chang YM, Kuo FC, Huang CY. The effect of weather, air pollution and seasonality on the number of patient visits for epileptic seizures: A population-based time-series study. *Epilepsy Behav*. 2021;115:107487. doi:10.1016/j.yebeh.2020.107487
38. Wei Y, Wang Y, Lin CK, et al. Associations between seasonal temperature and dementia-associated hospitalizations in New England. *Environ Int*. 2019;126:228-233. doi:10.1016/j.envint.2018.12.054
39. Farugia TL, Cuni-Lopez C, White AR. Potential Impacts of Extreme Heat and Bushfires on Dementia. *J Alzheimers Dis*. 2021;79(3):969-978. doi:10.3233/JAD-201388
40. Page LA, Hajat S, Kovats RS, Howard LM. Temperature-related deaths in people with psychosis, dementia and substance misuse. *Br J Psychiatry*. 2012;200(6):485-490. doi:10.1192/bjp.bp.111.100404
41. Byun S, Myung W, Kim H, Lee H. Association between diurnal temperature range and emergency department visits for multiple sclerosis: A time-stratified case-crossover study. *Sci Total Environ*. 2020;720:137565. doi:10.1016/j.scitotenv.2020.137565
42. Vojinovic S, Savic D, Lukic S, Savic L, Vojinovic J. Disease relapses in multiple sclerosis can be influenced by air pollution and climate seasonal conditions. *Vojnosanit Pregl*. 2015;72(1):44-49. doi:10.2298/VSP140121030V
43. Smedal T, Myhr KM, Aarseth JH, et al. The influence of warm versus cold climate on the effect of physiotherapy in multiple sclerosis: Physiotherapy and climate in MS. *Acta Neurol Scand*. 2011;124(1):45-52. doi:10.1111/j.1600-0404.2010.01407.x
44. Vodonos A, Novack V, Zlotnik Y, Ifergane G. Ambient air pollution, weather and daily emergency department visits for headache. *Cephalalgia*. 2015;35(12):1085-1091. doi:10.1177/0333102415570300
45. Mukamal KJ, Wellenius GA, Suh HH, Mittleman MA. Weather and air pollution as triggers of severe headaches. *Neurology*. 2009;72(10):922-927. doi:10.1212/01.wnl.0000344152.56020.94
46. Vonesch N, D'Ovidio MC, Melis P, Remoli ME, Ciufolini MG, Tomao P. Climate change, vector-borne diseases and working population. *Ann Ist Super Sanita*. 2016;52(3):397-405. doi:10.4415/ANN\_16\_03\_11
47. Zell R. Global climate change and the emergence/re-emergence of infectious diseases. *Int J Med Microbiol Suppl*. 2004;293:16-26. doi:10.1016/S1433-1128(04)80005-6
48. Andersen LK, Davis MDP. Climate change and the epidemiology of selected tick-borne and mosquito-borne diseases: update from the International Society of Dermatology Climate Change Task Force. *Int J Dermatol*. 2017;56(3):252-259. doi:10.1111/ijd.13438

49. Lindquist L, Vapalahti O. Tick-borne encephalitis. *The Lancet*. 2008;371(9627):1861-1871. doi:10.1016/S0140-6736(08)60800-4
50. Baylis M, Barker CM, Caminade C, et al. Emergence or improved detection of Japanese encephalitis virus in the Himalayan highlands? *Trans R Soc Trop Med Hyg*. 2016;110(4):209-211. doi:10.1093/trstmh/trw012
51. Agier L, Deroubaix A, Martiny N, Yaka P, Djibo A, Broutin H. Seasonality of meningitis in Africa and climate forcing: aerosols stand out. *J R Soc Interface*. 2013;10(79):20120814. doi:10.1098/rsif.2012.0814
52. Molesworth AM, Cuevas LE, Connor SJ, Morse AP, Thomson MC. Environmental Risk and Meningitis Epidemics in Africa. *Emerg Infect Dis*. 2003;9(10):1287-1293. doi:10.3201/eid0910.030182
53. Daniel M, Danielová V, Fialová A, Malý M, Kříž B, Nuttall PA. Increased Relative Risk of Tick-Borne Encephalitis in Warmer Weather. *Front Cell Infect Microbiol*. 2018;8:90. doi:10.3389/fcimb.2018.00090
54. Sumilo D, Asokliene L, Bormane A, Vasilenko V, Golovljova I, Randolph SE. Climate Change Cannot Explain the Upsurge of Tick-Borne Encephalitis in the Baltics. Sutherland C, ed. *PLoS ONE*. 2007;2(6):e500. doi:10.1371/journal.pone.0000500
55. Šumilo D, Bormane A, Asokliene L, et al. Socio-economic factors in the differential upsurge of tick-borne encephalitis in central and Eastern Europe. *Rev Med Virol*. 2008;18(2):81-95. doi:10.1002/rmv.566
56. Shocket MS, Verwillow AB, Numazu MG, et al. Transmission of West Nile and five other temperate mosquito-borne viruses peaks at temperatures between 23°C and 26°C. *eLife*. 2020;9:e58511. doi:10.7554/eLife.58511
57. Harrigan RJ, Thomassen HA, Buermann W, Smith TB. A continental risk assessment of West Nile virus under climate change. *Glob Change Biol*. 2014;20(8):2417-2425. doi:10.1111/gcb.12534
58. Morin CW, Comrie AC. Regional and seasonal response of a West Nile virus vector to climate change. *Proc Natl Acad Sci*. 2013;110(39):15620-15625. doi:10.1073/pnas.1307135110
59. Paull SH, Horton DE, Ashfaq M, et al. Drought and immunity determine the intensity of West Nile virus epidemics and climate change impacts. *Proc R Soc B Biol Sci*. 2017;284(1848):20162078. doi:10.1098/rspb.2016.2078
60. Zeman P, Beneš C. A tick-borne encephalitis ceiling in Central Europe has moved upwards during the last 30 years: Possible impact of global warming? *Int J Med Microbiol Suppl*. 2004;293:48-54. doi:10.1016/S1433-1128(04)80008-1
61. Randolph SE, Rogers DJ. Fragile transmission cycles of tick-borne encephalitis virus may be disrupted by predicted climate change. *Proc R Soc Lond B Biol Sci*. 2000;267(1454):1741-1744. doi:10.1098/rspb.2000.1204

62. Shaposhnikov D, Revich B, Bellander T, et al. Mortality Related to Air Pollution with the Moscow Heat Wave and Wildfire of 2010: *Epidemiology*. 2014;25(3):359-364. doi:10.1097/EDE.000000000000090
63. Chen H, Kwong JC, Copes R, et al. Exposure to ambient air pollution and the incidence of dementia: A population-based cohort study. *Environ Int*. 2017;108:271-277. doi:10.1016/j.envint.2017.08.020
64. Mortamais M, Gutierrez LA, de Hoogh K, et al. Long-term exposure to ambient air pollution and risk of dementia: Results of the prospective Three-City Study. *Environ Int*. 2021;148:106376. doi:10.1016/j.envint.2020.106376
65. Shin, Han, Choi. Exposure to Ambient Air Pollution and Cognitive Impairment in Community-Dwelling Older Adults: The Korean Frailty and Aging Cohort Study. *Int J Environ Res Public Health*. 2019;16(19):3767. doi:10.3390/ijerph16193767
66. Chen MC, Wang CF, Lai BC, et al. Air Pollution Is Associated with Poor Cognitive Function in Taiwanese Adults. *Int J Environ Res Public Health*. 2021;18(1):316. doi:10.3390/ijerph18010316
67. Salinas-Rodríguez A, Fernández-Niño JA, Manrique-Espinoza B, et al. Exposure to ambient PM2.5 concentrations and cognitive function among older Mexican adults. *Environ Int*. 2018;117:1-9. doi:10.1016/j.envint.2018.04.033
68. Iaccarino L, La Joie R, Lesman-Segev OH, et al. Association Between Ambient Air Pollution and Amyloid Positron Emission Tomography Positivity in Older Adults With Cognitive Impairment. *JAMA Neurol*. 2021;78(2):197. doi:10.1001/jamaneurol.2020.3962
69. Yitshak-Sade M, Nethery R, Schwartz JD, et al. PM2.5 and hospital admissions among Medicare enrollees with chronic debilitating brain disorders. *Sci Total Environ*. 2021;755:142524. doi:10.1016/j.scitotenv.2020.142524
70. Chen C, Xun P, Kaufman JD, et al. Erythrocyte omega-3 index, ambient fine particle exposure, and brain aging. *Neurology*. 2020;95(8):e995-e1007. doi:10.1212/WNL.0000000000010074
71. Cserbik D, Chen JC, McConnell R, et al. Fine particulate matter exposure during childhood relates to hemispheric-specific differences in brain structure. *Environ Int*. 2020;143:105933. doi:10.1016/j.envint.2020.105933
72. Chen JC, Wang X, Wellenius GA, et al. Ambient air pollution and neurotoxicity on brain structure: Evidence from women's health initiative memory study: Neurotoxic Air Pollution and WMV. *Ann Neurol*. 2015;78(3):466-476. doi:10.1002/ana.24460
73. Casanova R, Wang X, Reyes J, et al. A Voxel-Based Morphometry Study Reveals Local Brain Structural Alterations Associated with Ambient Fine Particles in Older Women. *Front Hum Neurosci*. 2016;10. doi:10.3389/fnhum.2016.00495
74. Cho J, Noh Y, Kim SY, et al. Long-Term Ambient Air Pollution Exposures and Brain Imaging Markers in Korean Adults: The Environmental Pollution-Induced Neurological Effects (EPINEF) Study. *Environ Health Perspect*. 2020;128(11):117006. doi:10.1289/EHP7133

75. Kim H, Noh J, Noh Y, Oh SS, Koh SB, Kim C. Gender Difference in the Effects of Outdoor Air Pollution on Cognitive Function Among Elderly in Korea. *Front Public Health*. 2019;7:375. doi:10.3389/fpubh.2019.00375
76. Wu Y, Lin Y, Yu H, et al. Association between air pollutants and dementia risk in the elderly. *Alzheimers Dement Diagn Assess Dis Monit*. 2015;1(2):220-228. doi:10.1016/j.dadm.2014.11.015
77. Kulick ER, Elkind MSV, Boehme AK, et al. Long-term exposure to ambient air pollution, APOE-ε4 status, and cognitive decline in a cohort of older adults in northern Manhattan. *Environ Int*. 2020;136:105440. doi:10.1016/j.envint.2019.105440
78. Lin FC, Chen CY, Lin CW, Wu MT, Chen HY, Huang P. Air Pollution Is Associated with Cognitive Deterioration of Alzheimer's Disease. *Gerontology*. Published online April 21, 2021:1-9. doi:10.1159/000515162
79. Li CY, Li CH, Martini S, Hou WH. Association between air pollution and risk of vascular dementia: A multipollutant analysis in Taiwan. *Environ Int*. 2019;133:105233. doi:10.1016/j.envint.2019.105233
80. Jiang Y, Lu H, Man Q, et al. Stroke burden and mortality attributable to ambient fine particulate matter pollution in 195 countries and territories and trend analysis from 1990 to 2017. *Environ Res*. 2020;184:109327. doi:10.1016/j.envres.2020.109327
81. Kulick ER, Wellenius GA, Kaufman JD, et al. Long-Term Exposure to Ambient Air Pollution and Subclinical Cerebrovascular Disease in NOMAS (the Northern Manhattan Study). *Stroke*. 2017;48(7):1966-1968. doi:10.1161/STROKEAHA.117.016672
82. Kulick ER, Wellenius GA, Boehme AK, Sacco RL, Elkind MS. Residential Proximity to Major Roadways and Risk of Incident Ischemic Stroke in NOMAS (The Northern Manhattan Study). *Stroke*. 2018;49(4):835-841. doi:10.1161/STROKEAHA.117.019580
83. Chen G, Wang A, Li S, et al. Long-Term Exposure to Air Pollution and Survival After Ischemic Stroke: The China National Stroke Registry Cohort. *Stroke*. 2019;50(3):563-570. doi:10.1161/STROKEAHA.118.023264
84. Hoffmann B, Weinmayr G, Hennig F, et al. Air Quality, Stroke, and Coronary Events. *Dtsch Arzteblatt Online*. Published online March 20, 2015. doi:10.3238/arztebl.2015.0195
85. Yang X, Zhang L, Chen X, et al. Long-term exposure to ambient PM<sub>2.5</sub> and stroke mortality among urban residents in northern China. *Ecotoxicol Environ Saf*. 2021;213:112063. doi:10.1016/j.ecoenv.2021.112063
86. Liu H, Tian Y, Xu Y, Zhang J. Ambient Particulate Matter Concentrations and Hospitalization for Stroke in 26 Chinese Cities: A Case-Crossover Study. *Stroke*. 2017;48(8):2052-2059. doi:10.1161/STROKEAHA.116.016482
87. Yitshak Sade M, Novack V, Ifergane G, Horev A, Kloog I. Air Pollution and Ischemic Stroke Among Young Adults. *Stroke*. 2015;46(12):3348-3353. doi:10.1161/STROKEAHA.115.010992

88. Qi X, Wang Z, Guo X, et al. Short-term effects of outdoor air pollution on acute ischaemic stroke occurrence: a case-crossover study in Tianjin, China. *Occup Environ Med*. 2020;77(12):862-867. doi:10.1136/oemed-2019-106301
89. Vidale S, Bonanomi A, Guidotti M, Arnaboldi M, Sterzi R. Air pollution positively correlates with daily stroke admission and in hospital mortality: a study in the urban area of Como, Italy. *Neurol Sci*. 2010;31(2):179-182. doi:10.1007/s10072-009-0206-8
90. Zheng S, Wang M, Wang S, Tao Y, Shang K. Short-Term Effects of Gaseous Pollutants and Particulate Matter on Daily Hospital Admissions for Cardio-Cerebrovascular Disease in Lanzhou: Evidence from a Heavily Polluted City in China. *Int J Environ Res Public Health*. 2013;10(2):462-477. doi:10.3390/ijerph10020462
91. Zhang R, Liu G, Jiang Y, et al. Acute Effects of Particulate Air Pollution on Ischemic Stroke and Hemorrhagic Stroke Mortality. *Front Neurol*. 2018;9:827. doi:10.3389/fneur.2018.00827
92. Wang X, Qian Z, Wang X, et al. Estimating the acute effects of fine and coarse particle pollution on stroke mortality of in six Chinese subtropical cities. *Environ Pollut*. 2018;239:812-817. doi:10.1016/j.envpol.2018.04.102
93. Hu K, Guo Y, Hu D, et al. Mortality burden attributable to PM1 in Zhejiang province, China. *Environ Int*. 2018;121:515-522. doi:10.1016/j.envint.2018.09.033
94. McClure LA, Loop MS, Crosson W, Kleindorfer D, Kissela B, Al-Hamdan M. Fine Particulate Matter (PM 2.5 ) and the Risk of Stroke in the REGARDS Cohort. *J Stroke Cerebrovasc Dis*. 2017;26(8):1739-1744. doi:10.1016/j.jstrokecerebrovasdis.2017.03.041
95. Wing JJ, Adar SD, Sánchez BN, Morgenstern LB, Smith MA, Lisabeth LD. Short-term exposures to ambient air pollution and risk of recurrent ischemic stroke. *Environ Res*. 2017;152:304-307. doi:10.1016/j.envres.2016.11.001
96. Wing JJ, Sánchez BN, Adar SD, et al. Synergism of Short-Term Air Pollution Exposures and Neighborhood Disadvantage on Initial Stroke Severity. *Stroke*. 2017;48(11):3126-3129. doi:10.1161/STROKEAHA.117.018816
97. Wilker EH, Martinez-Ramirez S, Kloog I, et al. Fine Particulate Matter, Residential Proximity to Major Roads, and Markers of Small Vessel Disease in a Memory Study Population. Calderón-Garcidueñas L, ed. *J Alzheimers Dis*. 2016;53(4):1315-1323. doi:10.3233/JAD-151143
98. Guan T, Xue T, Liu Y, et al. Differential Susceptibility in Ambient Particle-Related Risk of First-Ever Stroke: Findings From a National Case-Crossover Study. *Am J Epidemiol*. 2018;187(5):1001-1009. doi:10.1093/aje/kwy007
99. Wilker EH, Preis SR, Beiser AS, et al. Long-Term Exposure to Fine Particulate Matter, Residential Proximity to Major Roads and Measures of Brain Structure. *Stroke*. 2015;46(5):1161-1166. doi:10.1161/STROKEAHA.114.008348



100. Henrotin JB, Besancenot JP, Bejot Y, Giroud M. Short-term effects of ozone air pollution on ischaemic stroke occurrence: a case-crossover analysis from a 10-year population-based study in Dijon, France. *Occup Environ Med*. 2007;64(7):439-445. doi:10.1136/oem.2006.029306
101. Wing JJ, Adar SD, Sánchez BN, Morgenstern LB, Smith MA, Lisabeth LD. Ethnic differences in ambient air pollution and risk of acute ischemic stroke. *Environ Res*. 2015;143:62-67. doi:10.1016/j.envres.2015.09.031
102. Xue T, Guan T, Liu Y, et al. A national case-crossover study on ambient ozone pollution and first-ever stroke among Chinese adults: Interpreting a weak association via differential susceptibility. *Sci Total Environ*. 2019;654:135-143. doi:10.1016/j.scitotenv.2018.11.067
103. Nabavi SM, Jafari B, Jalali MS, Nedjat S, Ashrafi K, Salahesh A. Environmental air pollution and acute cerebrovascular complications: an ecologic study in tehran, iran. *Int J Prev Med*. 2012;3(10):723-729.
104. Shen S, Li X, Yuan C, et al. Association of short-term exposure to sulfur dioxide and hospitalization for ischemic and hemorrhagic stroke in Guangzhou, China. *BMC Public Health*. 2020;20(1):263. doi:10.1186/s12889-020-8354-0
105. Zhang R, Jiang Y, Zhang G, Yu M, Wang Y, Liu G. Association between short-term exposure to ambient air pollution and hospital admissions for transient ischemic attacks in Beijing, China. *Environ Sci Pollut Res*. 2021;28(6):6877-6885. doi:10.1007/s11356-020-10963-1
106. Nzwalo H, Guilherme P, Nogueira J, et al. Fine particulate air pollution and occurrence of spontaneous intracerebral hemorrhage in an area of low air pollution. *Clin Neurol Neurosurg*. 2019;176:67-72. doi:10.1016/j.clineuro.2018.11.022
107. Wilker EH, Mostofsky E, Fossa A, et al. Ambient Pollutants and Spontaneous Intracerebral Hemorrhage in Greater Boston. *Stroke*. 2018;49(11):2764-2766. doi:10.1161/STROKEAHA.118.023128
108. Bai L, Burnett RT, Kwong JC, et al. Long-term exposure to air pollution and the incidence of multiple sclerosis: A population-based cohort study. *Environ Res*. 2018;166:437-443. doi:10.1016/j.envres.2018.06.003
109. Roux J, Bard D, Le Pabic E, et al. Air pollution by particulate matter PM10 may trigger multiple sclerosis relapses. *Environ Res*. 2017;156:404-410. doi:10.1016/j.envres.2017.03.049
110. Angelici L, Piola M, Cavalleri T, et al. Effects of particulate matter exposure on multiple sclerosis hospital admission in Lombardy region, Italy. *Environ Res*. 2016;145:68-73. doi:10.1016/j.envres.2015.11.017
111. Januel E, Dessimond B, Colette A, Annesi-Maesano I, Stankoff B. Fine Particulate Matter Related to Multiple Sclerosis Relapse in Young Patients. *Front Neurol*. 2021;12:651084. doi:10.3389/fneur.2021.651084

112. Cliff R, Curran J, Hirota JA, Brauer M, Feldman H, Carlsten C. Effect of diesel exhaust inhalation on blood markers of inflammation and neurotoxicity: a controlled, blinded crossover study. *Inhal Toxicol*. 2016;28(3):145-153. doi:10.3109/08958378.2016.1145770
113. Cortese A, Lova L, Comoli P, et al. Air pollution as a contributor to the inflammatory activity of multiple sclerosis. *J Neuroinflammation*. 2020;17(1):334. doi:10.1186/s12974-020-01977-0
114. Elser H, Morello-Frosch R, Jacobson A, et al. Air pollution, methane super-emitters, and oil and gas wells in Northern California: the relationship with migraine headache prevalence and exacerbation. *Environ Health*. 2021;20(1):45. doi:10.1186/s12940-021-00727-w
115. Lee H, Myung W, Cheong HK, et al. Ambient air pollution exposure and risk of migraine: Synergistic effect with high temperature. *Environ Int*. 2018;121:383-391. doi:10.1016/j.envint.2018.09.022
116. Hong SY, Wan L, Lin HJ, Lin CL, Wei CC. Long-Term Ambient Air Pollutant Exposure and Risk of Recurrent Headache in Children: A 12-Year Cohort Study. *Int J Environ Res Public Health*. 2020;17(23):9140. doi:10.3390/ijerph17239140
117. Toro R, Downward GS, van der Mark M, et al. Parkinson's disease and long-term exposure to outdoor air pollution: A matched case-control study in the Netherlands. *Environ Int*. 2019;129:28-34. doi:10.1016/j.envint.2019.04.069
118. Palacios N, Fitzgerald KC, Hart JE, et al. Air Pollution and Risk of Parkinson's Disease in a Large Prospective Study of Men. *Environ Health Perspect*. 2017;125(8):087011. doi:10.1289/EHP259
119. Kirrane EF, Bowman C, Davis JA, et al. Associations of Ozone and PM2.5 Concentrations With Parkinson's Disease Among Participants in the Agricultural Health Study. *J Occup Environ Med*. 2015;57(5):509-517. doi:10.1097/JOM.0000000000000451
120. Chen CY, Hung HJ, Chang KH, et al. Long-term exposure to air pollution and the incidence of Parkinson's disease: A nested case-control study. Mortimer K, ed. *PLOS ONE*. 2017;12(8):e0182834. doi:10.1371/journal.pone.0182834
121. Fleury V, Himsl R, Joost S, et al. Geospatial analysis of individual-based Parkinson's disease data supports a link with air pollution: A case-control study. *Parkinsonism Relat Disord*. 2021;83:41-48. doi:10.1016/j.parkreldis.2020.12.013
122. Shin S, Burnett RT, Kwong JC, et al. Effects of ambient air pollution on incident Parkinson's disease in Ontario, 2001 to 2013: a population-based cohort study. *Int J Epidemiol*. 2018;47(6):2038-2048. doi:10.1093/ije/dyy172
123. Lee PC, Raaschou-Nielsen O, Lill CM, et al. Gene-environment interactions linking air pollution and inflammation in Parkinson's disease. *Environ Res*. 2016;151:713-720. doi:10.1016/j.envres.2016.09.006
124. Lee PC, Liu LL, Sun Y, et al. Traffic-related air pollution increased the risk of Parkinson's disease in Taiwan: A nationwide study. *Environ Int*. 2016;96:75-81. doi:10.1016/j.envint.2016.08.017

125. Seelen M, Toro Campos RA, Veldink JH, et al. Long-Term Air Pollution Exposure and Amyotrophic Lateral Sclerosis in Netherlands: A Population-based Case–control Study. *Environ Health Perspect.* 2017;125(9):097023. doi:10.1289/EHP1115
126. Filippini T, Mandrioli J, Malagoli C, et al. Risk of Amyotrophic Lateral Sclerosis and Exposure to Particulate Matter from Vehicular Traffic: A Case-Control Study. *Int J Environ Res Public Health.* 2021;18(3):973. doi:10.3390/ijerph18030973
127. Nunez Y, Boehme AK, Weisskopf MG, et al. Fine Particle Exposure and Clinical Aggravation in Neurodegenerative Diseases in New York State. *Environ Health Perspect.* 2021;129(2):027003. doi:10.1289/EHP7425
128. Chiu YHM, Hsu HHL, Coull BA, et al. Prenatal particulate air pollution and neurodevelopment in urban children: Examining sensitive windows and sex-specific associations. *Environ Int.* 2016;87:56-65. doi:10.1016/j.envint.2015.11.010
129. Bansal E, Hsu HH, de Water E, et al. Prenatal PM2.5 exposure in the second and third trimesters predicts neurocognitive performance at age 9–10 years: A cohort study of Mexico City children. *Environ Res.* 2021;202:111651. doi:10.1016/j.envres.2021.111651
130. Moreira LA, Iturbe-Ormaetxe I, Jeffery JA, et al. A Wolbachia Symbiont in *Aedes aegypti* Limits Infection with Dengue, Chikungunya, and Plasmodium. *Cell.* 2009;139(7):1268-1278. doi:10.1016/j.cell.2009.11.042
131. Jiggins FM. The spread of Wolbachia through mosquito populations. *PLOS Biol.* 2017;15(6):e2002780. doi:10.1371/journal.pbio.2002780
132. Roy B, Nowak RJ, Roda R, et al. Teleneurology during the COVID-19 pandemic: A step forward in modernizing medical care. *J Neurol Sci.* 2020;414:116930. doi:10.1016/j.jns.2020.116930
133. Bokolo Anthony Jnr. Use of Telemedicine and Virtual Care for Remote Treatment in Response to COVID-19 Pandemic. *J Med Syst.* 2020;44(7):132. doi:10.1007/s10916-020-01596-5

## Supplementary Information

**Supplementary Table 1. Studies of neuro-infectious diseases and their locations.** Studies of neuro-infectious diseases associated with climate change, article type (primary or review), and the primary location of study, that were included in scoping review. TBE refers to tick-borne encephalitis. WNV refers to West Nile virus. JEV refers to Japanese encephalitis virus. DENV refers to Dengue virus.

| Study             | Ref. | Organism                                                           | Location      | Type    |
|-------------------|------|--------------------------------------------------------------------|---------------|---------|
| Agier 2013        | 1    | TBE                                                                | Africa        | Primary |
| Andersen 2017     | 2    | WNV, TBE                                                           | Global        | Review  |
| Andreassen 2012   | 3    | TBE                                                                | Europe        | Primary |
| Bai 2013          | 4    | mosquito borne illness systematic review                           | Asia          | Review  |
| Baylis 2016       | 5    | JEV                                                                | Asia          | Primary |
| Bi 2007           | 6    | JEV                                                                | Asia          | Primary |
| Daep 2014         | 7    | flaviviruses (DENV, JEV, WNV)                                      | Global        | Review  |
| Daniel 2018       | 8    | TBE                                                                | Europe        | Primary |
| Daniel 2008       | 9    | TBE ixodes                                                         | Europe        | Primary |
| Davis 2018        | 10   | WNV                                                                | North America | Primary |
| Dhimal 2015       | 11   | Dengue, lymphatic filariasis, JEV, visceral leishmaniasis, malaria | Asia          | Review  |
| Dobrotvorski 1999 | 12   | TBE                                                                | Asia          | Primary |
| Gould 2009        | 13   | WNV, Chikungunya, rift valley fever, bluetongue virus              | North America | Review  |
| Harrigan 2014     | 14   | WNV                                                                | North America | Primary |
| Hsu 2008          | 15   | JEV                                                                | Asia          | Primary |
| Jaenson 2018      | 16   | TBE                                                                | Europe        | Review  |
| Lindgren 2000     | 17   | TBE ixodes                                                         | Europe        | Primary |
| Lindgren 2001     | 18   | TBE                                                                | Europe        | Primary |
| Marini 2016       | 19   | Culex pipiens (mosquito)                                           | Europe        | Primary |
| Mazamay 2020      | 20   | Meningitis unspecified                                             | Africa        | Primary |
| Mihailovic 2020   | 21   | WNV, Anopheles hyrcapus                                            | Europe        | Primary |
| Molesworth 2003   | 22   | meningitis                                                         | Africa        | Primary |
| Morin 2013        | 23   | WNV                                                                | North America | Primary |
| Murty 2010        | 24   | JEV                                                                | Asia          | Primary |
| Paull 2017        | 25   | WNV                                                                | North America | Primary |
| Rainham 2005      | 26   | WNV                                                                | North America | Review  |
| Randolph 2000     | 27   | TBE                                                                | Europe        | Review  |
| Russell 1998      | 28   | arbovirus                                                          | Australia     | Review  |
| Samy 2016         | 29   | TBE ixodes                                                         | Global        | Primary |
| Shocket 2020      | 30   | WNV                                                                | North America | Primary |
| Singh 2020        | 31   | JEV                                                                | Asia          | Primary |
| Skaff 2020        | 32   | Culex quinquefasciatus (mosquito)                                  | North America | Primary |

|                 |    |                                   |               |         |
|-----------------|----|-----------------------------------|---------------|---------|
| Soverow 2009    | 33 | WNV                               | North America | Primary |
| Sumilo 2007     | 34 | TBE                               | Europe        | Primary |
| Sumilo 2008     | 35 | TBE                               | Europe        | Primary |
| Tokarevich 2017 | 36 | Culex quinquefasciatus (mosquito) | Asia          | Primary |
| Uejio 2012      | 37 | WNV                               | Africa        | Primary |
| Vonesch 2016    | 38 | WNV, TBE                          | Europe        | Review  |
| Wang 2010       | 39 | WNV                               | North America | Primary |
| Zeman 2004      | 40 | TBE                               | Europe        | Primary |
| Zhang 2016      | 41 | JEV                               | Asia          | Primary |

## Supplementary References

1. Agier L, Deroubaix A, Martiny N, Yaka P, Djibo A, Broutin H. Seasonality of meningitis in Africa and climate forcing: aerosols stand out. *J R Soc Interface*. 2013;10(79):20120814. doi:10.1098/rsif.2012.0814
2. Andersen LK, Davis MDP. Climate change and the epidemiology of selected tick-borne and mosquito-borne diseases: update from the International Society of Dermatology Climate Change Task Force. *Int J Dermatol*. 2017;56(3):252-259. doi:10.1111/ijd.13438
3. Andreassen A, Jore S, Cuber P, et al. Prevalence of tick borne encephalitis virus in tick nymphs in relation to climatic factors on the southern coast of Norway. *Parasit Vectors*. 2012;5(1):177. doi:10.1186/1756-3305-5-177
4. Bai L, Morton LC, Liu Q. Climate change and mosquito-borne diseases in China: a review. *Glob Health*. 2013;9(1):10. doi:10.1186/1744-8603-9-10
5. Baylis M, Barker CM, Caminade C, et al. Emergence or improved detection of Japanese encephalitis virus in the Himalayan highlands? *Trans R Soc Trop Med Hyg*. 2016;110(4):209-211. doi:10.1093/trstmh/trw012
6. Bi P, Zhang Y, Parton KA. Weather variables and Japanese encephalitis in the metropolitan area of Jinan city, China. *J Infect*. 2007;55(6):551-556. doi:10.1016/j.jinf.2007.07.004
7. Daep CA, Muñoz-Jordán JL, Eugenin EA. Flaviviruses, an expanding threat in public health: focus on dengue, West Nile, and Japanese encephalitis virus. *J Neurovirol*. 2014;20(6):539-560. doi:10.1007/s13365-014-0285-z
8. Daniel M, Danielová V, Fialová A, Malý M, Kříž B, Nuttall PA. Increased Relative Risk of Tick-Borne Encephalitis in Warmer Weather. *Front Cell Infect Microbiol*. 2018;8:90. doi:10.3389/fcimb.2018.00090
9. Daniel M, Kříž B, Danielová V, Valter J, Kott I. Correlation between meteorological factors and tick-borne encephalitis incidence in the Czech Republic. *Parasitol Res*. 2008;103(S1):97-107. doi:10.1007/s00436-008-1061-x
10. Davis JK, Vincent GP, Hildreth MB, Kightlinger L, Carlson C, Wimberly MC. Improving the prediction of arbovirus outbreaks: A comparison of climate-driven models for West Nile virus in an endemic region of the United States. *Acta Trop*. 2018;185:242-250. doi:10.1016/j.actatropica.2018.04.028

11. Dhimal M, Ahrens B, Kuch U. Climate Change and Spatiotemporal Distributions of Vector-Borne Diseases in Nepal – A Systematic Synthesis of Literature. Baylis M, ed. *PLOS ONE*. 2015;10(6):e0129869. doi:10.1371/journal.pone.0129869
12. Dobrotvorskiĭ AK, Efimov VM, Umnov IV, Evstigneeva NS, Tolkunova II. [An analysis of the space-time changes in tick-borne encephalitis morbidity in Novosibirsk Province]. *Med Parazitol (Mosk)*. 1999;(1):10-12.
13. Gould EA, Solomon T, Mackenzie JS. Does antiviral therapy have a role in the control of Japanese encephalitis? *Antiviral Res*. 2008;78(1):140-149. doi:10.1016/j.antiviral.2007.10.005
14. Harrigan RJ, Thomassen HA, Buermann W, Smith TB. A continental risk assessment of West Nile virus under climate change. *Glob Change Biol*. 2014;20(8):2417-2425. doi:10.1111/gcb.12534
15. Hsu SM, Yen AMF, Chen THH. The impact of climate on Japanese encephalitis. *Epidemiol Infect*. 2008;136(7):980-987. doi:10.1017/S0950268807009454
16. Jaenson TGT, Petersson EH, Jaenson DGE, et al. The importance of wildlife in the ecology and epidemiology of the TBE virus in Sweden: incidence of human TBE correlates with abundance of deer and hares. *Parasit Vectors*. 2018;11(1):477. doi:10.1186/s13071-018-3057-4
17. Lindgren E, Tälleklint L, Polfeldt T. Impact of climatic change on the northern latitude limit and population density of the disease-transmitting European tick *Ixodes ricinus*. *Environ Health Perspect*. 2000;108(2):119-123. doi:10.1289/ehp.00108119
18. Lindgren E, Gustafson R. Tick-borne encephalitis in Sweden and climate change. *The Lancet*. 2001;358(9275):16-18. doi:10.1016/S0140-6736(00)05250-8
19. Marini G, Poletti P, Giacobini M, Pugliese A, Merler S, Rosà R. The Role of Climatic and Density Dependent Factors in Shaping Mosquito Population Dynamics: The Case of *Culex pipiens* in Northwestern Italy. Hwang J-S, ed. *PLOS ONE*. 2016;11(4):e0154018. doi:10.1371/journal.pone.0154018
20. Mazamay S, Broutin H, Bompangue D, Muyembe J-J, Guégan J-F. The environmental drivers of bacterial meningitis epidemics in the Democratic Republic of Congo, central Africa. Zunt JR, ed. *PLoS Negl Trop Dis*. 2020;14(10):e0008634. doi:10.1371/journal.pntd.0008634
21. Mihailović DT, Petrić D, Petrović T, et al. Assessment of climate change impact on the malaria vector *Anopheles hyrcanus*, West Nile disease, and incidence of melanoma in the Vojvodina Province (Serbia) using data from a regional climate model. Samy AM, ed. *PLOS ONE*. 2020;15(1):e0227679. doi:10.1371/journal.pone.0227679
22. Molesworth AM, Cuevas LE, Connor SJ, Morse AP, Thomson MC. Environmental Risk and Meningitis Epidemics in Africa. *Emerg Infect Dis*. 2003;9(10):1287-1293. doi:10.3201/eid0910.030182
23. Morin CW, Comrie AC. Regional and seasonal response of a West Nile virus vector to climate change. *Proc Natl Acad Sci*. 2013;110(39):15620-15625. doi:10.1073/pnas.1307135110
24. Murty US, Rao MS, Arunachalam N. The effects of climatic factors on the distribution and abundance of Japanese encephalitis vectors in Kurnool district of Andhra Pradesh, India. *J Vector Borne Dis*. 2010;47(1):26-32.

25. Paull SH, Horton DE, Ashfaq M, et al. Drought and immunity determine the intensity of West Nile virus epidemics and climate change impacts. *Proc R Soc B Biol Sci*. 2017;284(1848):20162078. doi:10.1098/rspb.2016.2078
26. Rainham DGC. Ecological Complexity and West Nile Virus: Perspectives on Improving Public Health Response. *Can J Public Health*. 2005;96(1):37-40. doi:10.1007/BF03404012
27. Randolph SE, Rogers DJ. Fragile transmission cycles of tick-borne encephalitis virus may be disrupted by predicted climate change. *Proc R Soc Lond B Biol Sci*. 2000;267(1454):1741-1744. doi:10.1098/rspb.2000.1204
28. Russell RC. Mosquito-borne arboviruses in Australia: the current scene and implications of climate change for human health. *Int J Parasitol*. 1998;28(6):955-969. doi:10.1016/S0020-7519(98)00053-8
29. Samy AM, Elaagip AH, Kenawy MA, Ayres CFJ, Peterson AT, Soliman DE. Climate Change Influences on the Global Potential Distribution of the Mosquito *Culex quinquefasciatus*, Vector of West Nile Virus and Lymphatic Filariasis. LaDeau SL, ed. *PLOS ONE*. 2016;11(10):e0163863. doi:10.1371/journal.pone.0163863
30. Shocket MS, Verwillow AB, Numazu MG, et al. Transmission of West Nile and five other temperate mosquito-borne viruses peaks at temperatures between 23°C and 26°C. *eLife*. 2020;9:e58511. doi:10.7554/eLife.58511
31. Singh H, Singh N, Mall RK. Japanese Encephalitis and Associated Environmental Risk Factors in Eastern Uttar Pradesh: A time series analysis from 2001 to 2016. *Acta Trop*. 2020;212:105701. doi:10.1016/j.actatropica.2020.105701
32. Skaff NK, Cheng Q, Clemesha RES, et al. Thermal thresholds heighten sensitivity of West Nile virus transmission to changing temperatures in coastal California. *Proc R Soc B Biol Sci*. 2020;287(1932):20201065. doi:10.1098/rspb.2020.1065
33. Soverow JE, Wellenius GA, Fisman DN, Mittleman MA. Infectious Disease in a Warming World: How Weather Influenced West Nile Virus in the United States (2001–2005). *Environ Health Perspect*. 2009;117(7):1049-1052. doi:10.1289/ehp.0800487
34. Šumilo D, Asokliene L, Bormane A, Vasilenko V, Golovljova I, Randolph SE. Climate Change Cannot Explain the Upsurge of Tick-Borne Encephalitis in the Baltics. Sutherland C, ed. *PLoS ONE*. 2007;2(6):e500. doi:10.1371/journal.pone.0000500
35. Šumilo D, Bormane A, Asokliene L, et al. Socio-economic factors in the differential upsurge of tick-borne encephalitis in central and Eastern Europe. *Rev Med Virol*. 2008;18(2):81-95. doi:10.1002/rmv.566
36. Tokarevich N, Tronin A, Gnativ B, Revich B, Blinova O, Evengard B. Impact of air temperature variation on the ixodid ticks habitat and tick-borne encephalitis incidence in the Russian Arctic: the case of the Komi Republic. *Int J Circumpolar Health*. 2017;76(1):1298882. doi:10.1080/22423982.2017.1298882
37. Uejio CK, Kemp A, Comrie AC. Climatic Controls on West Nile Virus and Sindbis Virus Transmission and Outbreaks in South Africa. *Vector-Borne Zoonotic Dis*. 2012;12(2):117-125. doi:10.1089/vbz.2011.0655

38. Vonesch N, D'Ovidio MC, Melis P, Remoli ME, Ciufolini MG, Tomao P. Climate change, vector-borne diseases and working population. *Ann Ist Super Sanita*. 2016;52(3):397-405. doi:10.4415/ANN\_16\_03\_11
39. Wang G, Minnis RB, Belant JL, Wax CL. Dry weather induces outbreaks of human West Nile virus infections. *BMC Infect Dis*. 2010;10(1):38. doi:10.1186/1471-2334-10-38
40. Zeman P, Beneš C. A tick-borne encephalitis ceiling in Central Europe has moved upwards during the last 30 years: Possible impact of global warming? *Int J Med Microbiol Suppl*. 2004;293:48-54. doi:10.1016/S1433-1128(04)80008-1
41. Zhang F, Liu Z, Zhang C, Jiang B. Short-term effects of floods on Japanese encephalitis in Nanchong, China, 2007–2012: A time-stratified case-crossover study. *Sci Total Environ*. 2016;563-564:1105-1110. doi:10.1016/j.scitotenv.2016.05.162
